# Supplementary material for: The prefoldin complex stabilizes the von Hippel-Lindau protein against aggregation and degradation
Source: PubMed Central journal article supplement (PMC7660911; doi:10.1371/journal.pgen.1009183), 2020-11-02
Supplement: pgen.1009183.s003.pdf [file pgen.1009183.s003.pdf]

**A**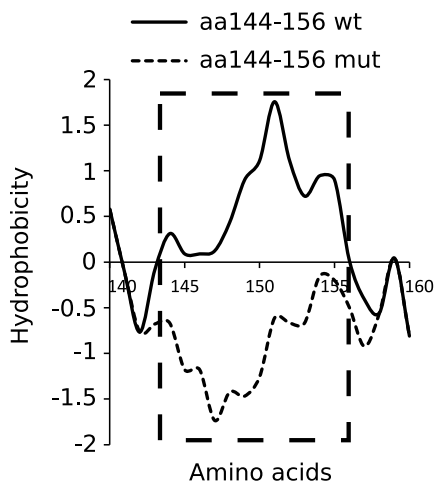**C**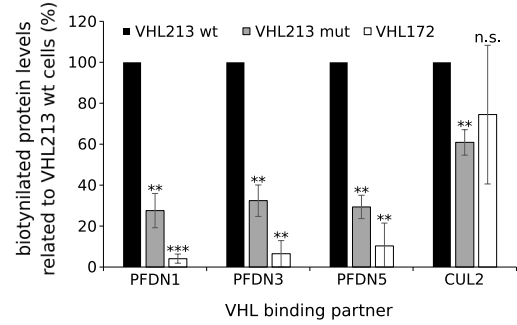**B**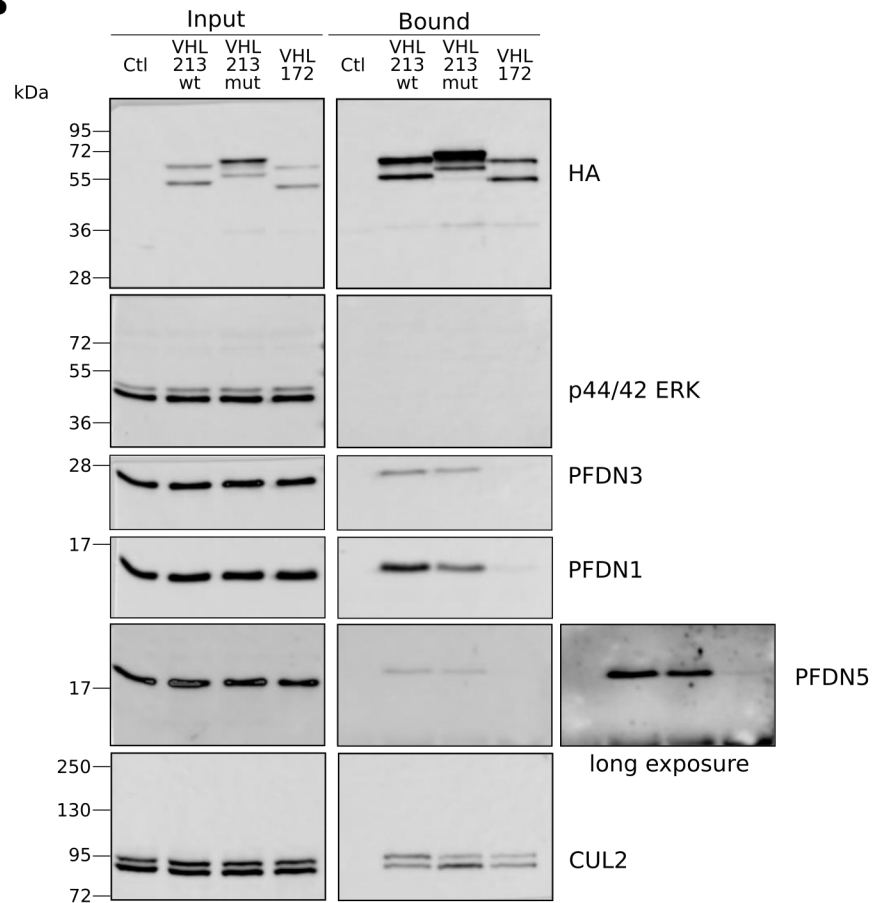

S3 Fig
