# Supplementary material for: The prefoldin complex stabilizes the von Hippel-Lindau protein against aggregation and degradation
Source: PubMed Central journal article supplement (PMC7660911; doi:10.1371/journal.pgen.1009183), 2020-11-02
Supplement: pgen.1009183.s004.pdf [file pgen.1009183.s004.pdf]

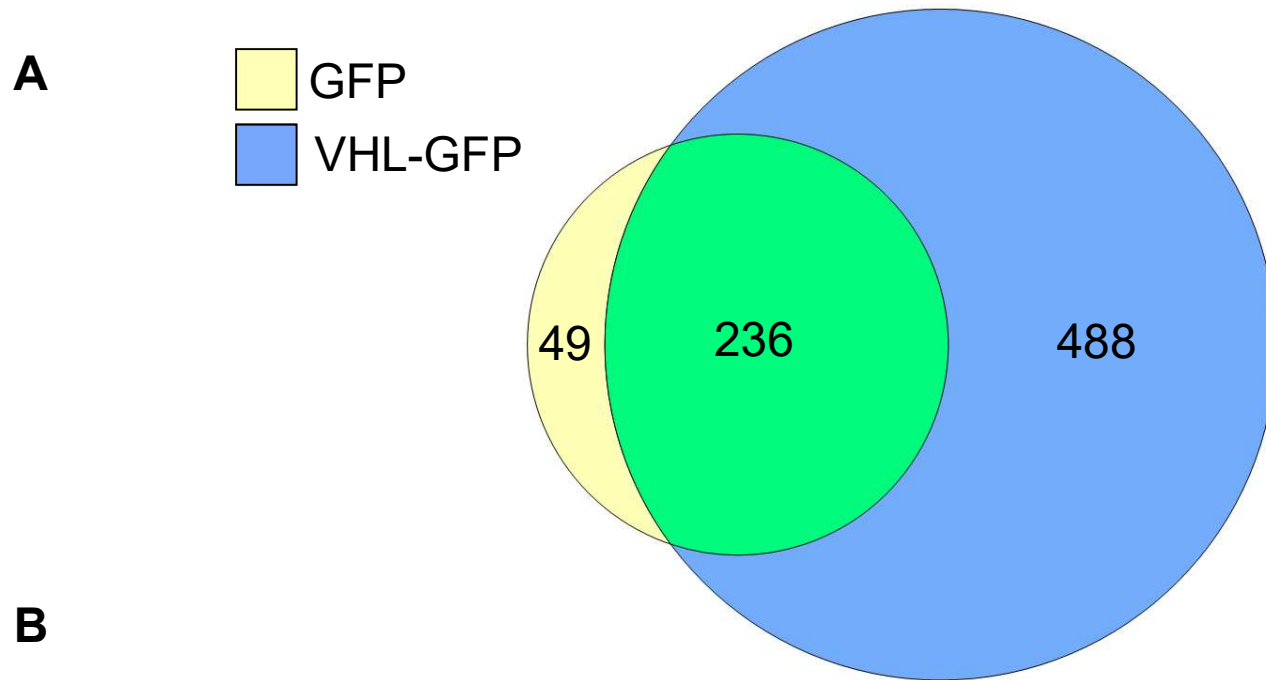

| Category           | GO ID   | GO term         | <i>P</i> -value |
|--------------------|---------|-----------------|-----------------|
| Biological process | 0006457 | Protein folding | 7.2E-06         |
| Cellular component | 0005829 | Cytosol         | 6.3E-21         |
| Molecular function | 0005524 | ATP binding     | 1.9E-10         |
