# Supplementary material for: The prefoldin complex stabilizes the von Hippel-Lindau protein against aggregation and degradation
Source: PubMed Central journal article supplement (PMC7660911; doi:10.1371/journal.pgen.1009183), 2020-11-02
Supplement: pgen.1009183.s015.pdf [file pgen.1009183.s015.pdf]

S2 Table: Sequence conservation of prefoldin subunits in model eukaryotes.

| Gene name   | gene ID     | alias        | subunit type | product size (aa) | Human homologue | % amino acid identity |                     |                                |                               |                                 |
|-------------|-------------|--------------|--------------|-------------------|-----------------|-----------------------|---------------------|--------------------------------|-------------------------------|---------------------------------|
|             |             |              |              |                   |                 | <i>Homo sapiens</i>   | <i>Mus musculus</i> | <i>Drosophila melanogaster</i> | <i>Caenorhabditis elegans</i> | <i>Saccharomyces cerevisiae</i> |
| <i>pdf1</i> | SPBC1D7.01  | none         | beta         | 112               | <i>PFDN1</i>    | 21.4                  | 21.4                | 19.6                           | 25.9                          | 28.4                            |
| <i>pdf2</i> | SPAC227.10  | none         | beta         | 114               | <i>PFDN2</i>    | 31.6                  | 31.6                | 29.0                           | 21.1                          | 41.4                            |
| <i>pdf3</i> | SPAC3H8.07c | <i>pac10</i> | alpha        | 169               | <i>PFDN3</i>    | 43.2                  | 43.2                | 39.3                           | 34.3                          | 44.9                            |
| <i>pdf4</i> | SPAC227.05  | none         | beta         | 123               | <i>PFDN4</i>    | 34.2                  | 32.5                | 26.7                           | 34.7                          | 33.6                            |
| <i>pdf5</i> | SPBC215.02  | <i>bob1</i>  | alpha        | 154               | <i>PFDN5</i>    | 45.2                  | 45.2                | 32.9                           | 32.2                          | 35.8                            |
| <i>pdf6</i> | SPAC3A11.13 | none         | beta         | 114               | <i>PFDN6</i>    | 36.8                  | 36.8                | 32.5                           | 29.5                          | 42.1                            |
